# Supplementary material
Source: PubMed Central journal article supplement (PMC6620640)

Supplementary Figure 1

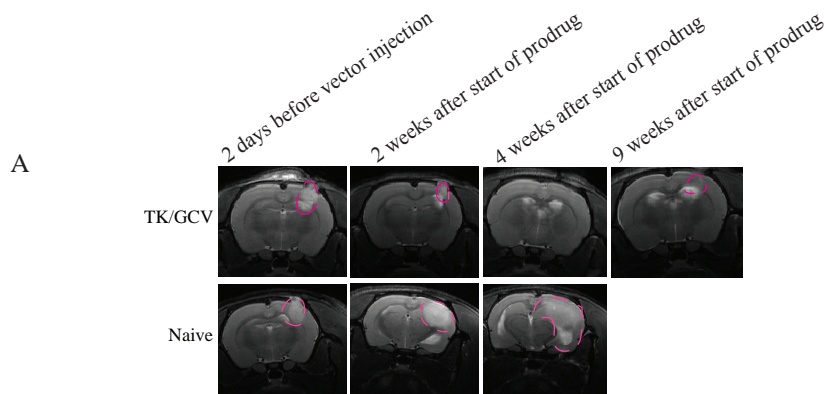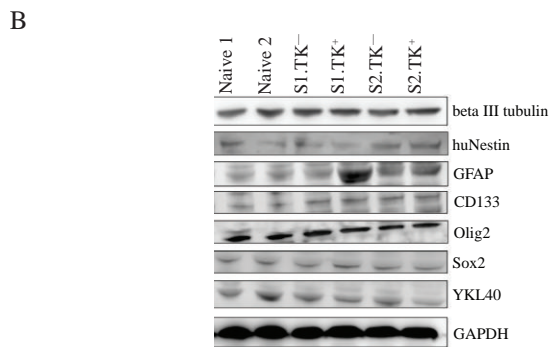

Supplementary Figure 2

A

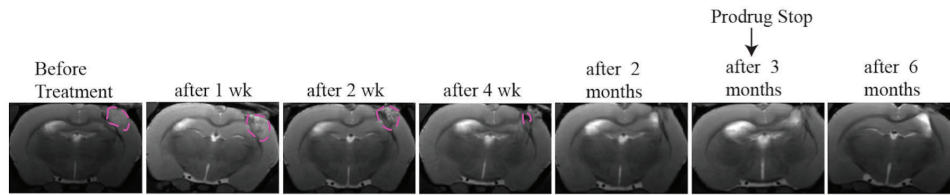

B

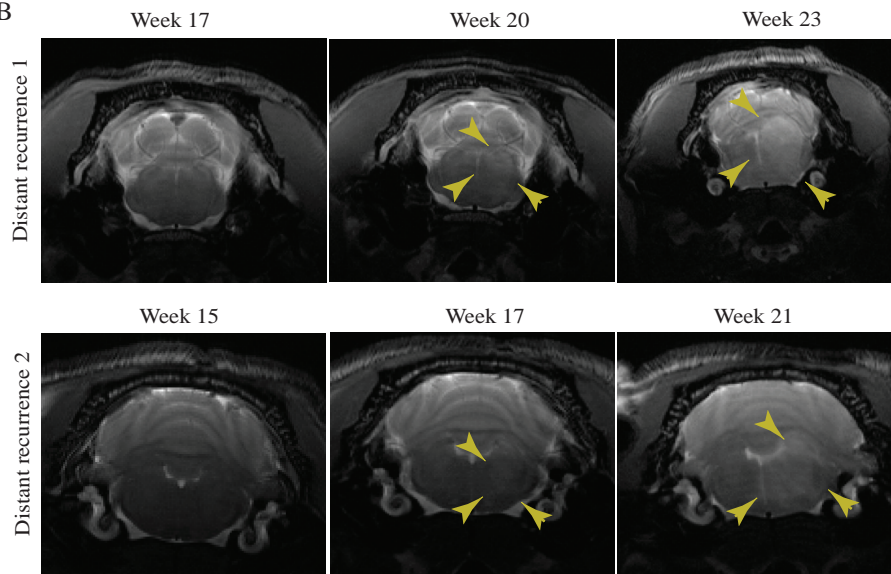

Supplementary Figure 3

A

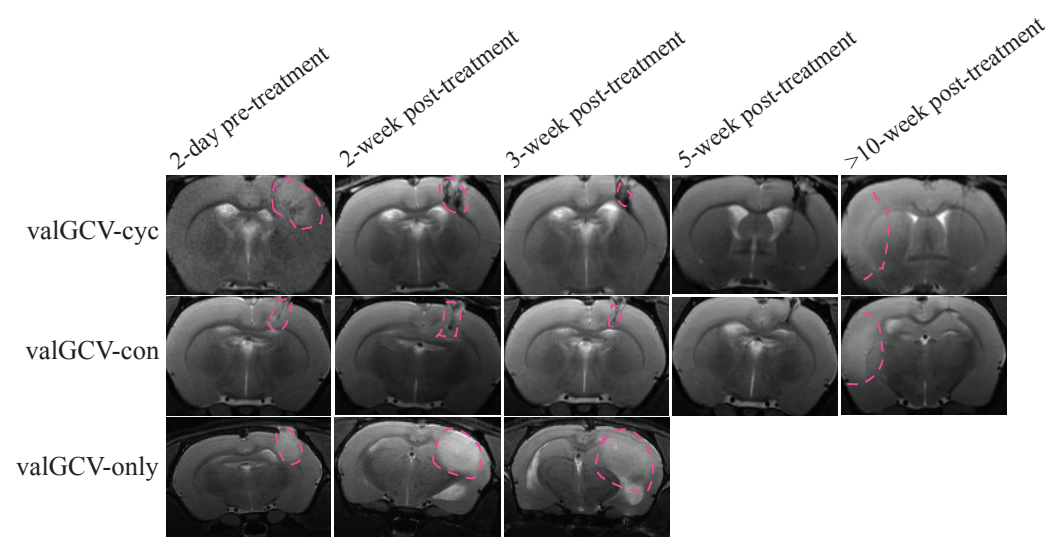

B

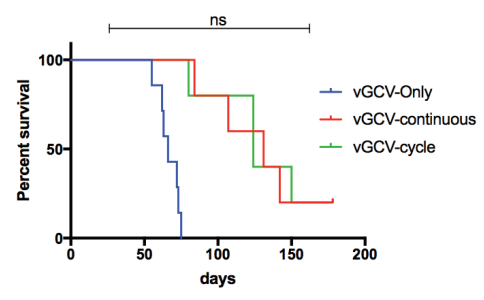

Supplementary Figure 4

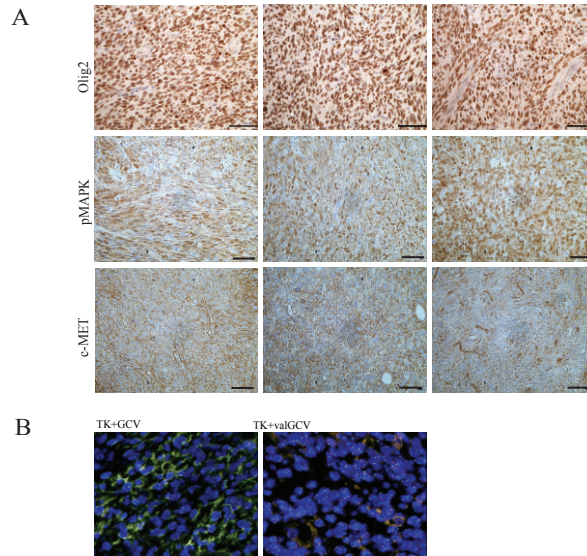

# Supplementary Figure 5

A

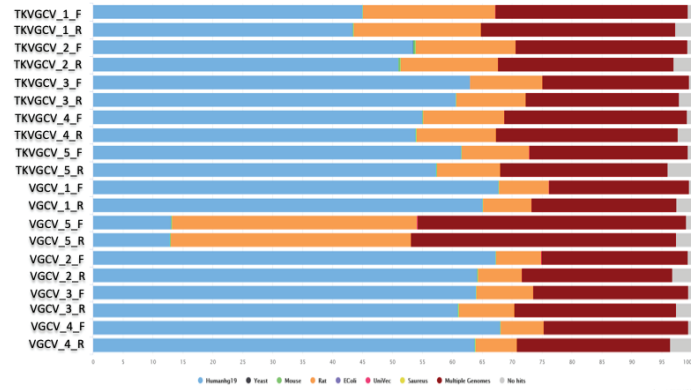

B

PCA plot of transformed counts (variance stabilizing) 73%

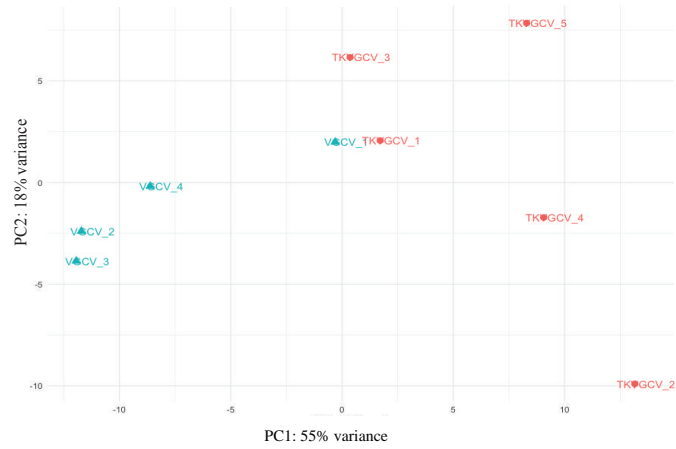

A

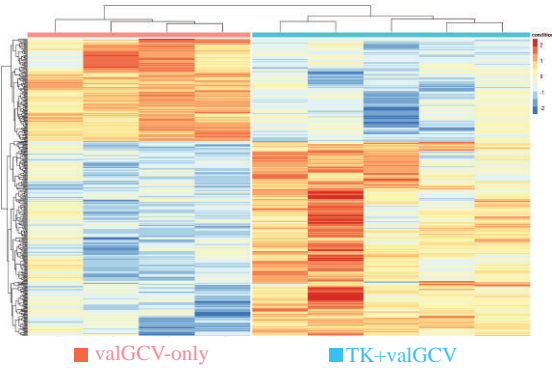

B

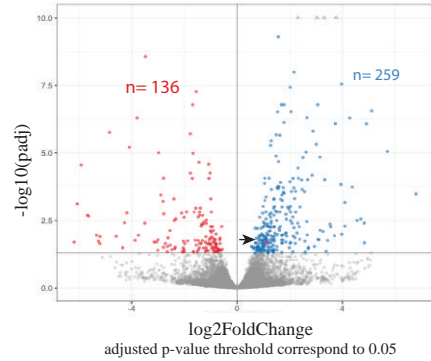

C

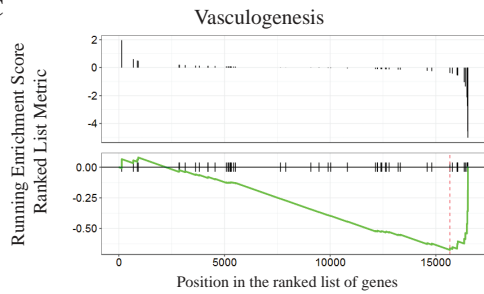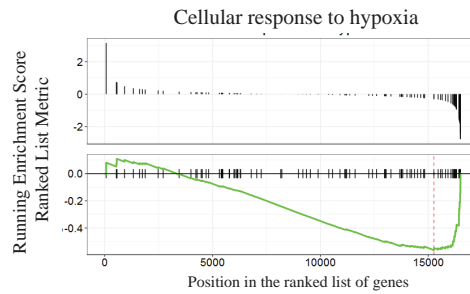

D

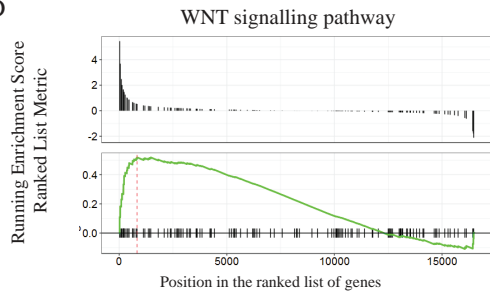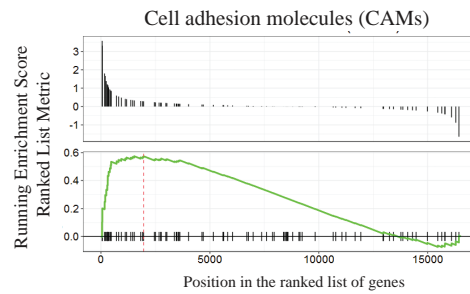

Supplement: noz060_suppl_supplementary_figures.pdf [file noz060_suppl_supplementary_figures.pdf]
